# Supplementary material for: Extracellular Vesicle-Based Drug Delivery Systems for Head and Neck Squamous Cell Carcinoma: A Systematic Review
Source: MDPI journal article supplement (doi:10.3390/pharmaceutics15051327), 2023-04-24
Supplement: s1 [file s1]

**Table S1.** The risk of bias included in a systematic review assessed using the OHAT risk of bias.

|             | Was administered dose or exposure level adequately randomized? | Was allocation to study groups adequately concealed? | Did selection of study participants result in appropriate comparison groups? | Were experimental conditions identical across study groups? | Were the research personnel and human subjects blinded to the study group during the study? | Were outcome data complete without attrition or exclusion from analysis? | Can we be confident in the exposure characterization? | Can we be confident in the outcome assessment? | Were all measured outcomes reported? | Were there no other potential threats to internal validity? |
|-------------|----------------------------------------------------------------|------------------------------------------------------|------------------------------------------------------------------------------|-------------------------------------------------------------|---------------------------------------------------------------------------------------------|--------------------------------------------------------------------------|-------------------------------------------------------|------------------------------------------------|--------------------------------------|-------------------------------------------------------------|
| Cohen [12]  |                                                                |                                                      |                                                                              |                                                             |                                                                                             |                                                                          |                                                       |                                                |                                      |                                                             |
| Cui [13]    |                                                                |                                                      |                                                                              |                                                             |                                                                                             |                                                                          |                                                       |                                                |                                      |                                                             |
| Deng [14]   |                                                                |                                                      |                                                                              |                                                             |                                                                                             |                                                                          |                                                       |                                                |                                      |                                                             |
| Kase [15]   |                                                                |                                                      |                                                                              |                                                             |                                                                                             |                                                                          |                                                       |                                                |                                      |                                                             |
| Li [17]     |                                                                |                                                      |                                                                              |                                                             |                                                                                             |                                                                          |                                                       |                                                |                                      |                                                             |
| Li [16]     |                                                                |                                                      |                                                                              |                                                             |                                                                                             |                                                                          |                                                       |                                                |                                      |                                                             |
| Liu [18]    |                                                                |                                                      |                                                                              |                                                             |                                                                                             |                                                                          |                                                       |                                                |                                      |                                                             |
| Liu [19]    |                                                                |                                                      |                                                                              |                                                             |                                                                                             |                                                                          |                                                       |                                                |                                      |                                                             |
| Qiu [20]    |                                                                |                                                      |                                                                              |                                                             |                                                                                             |                                                                          |                                                       |                                                |                                      |                                                             |
| Sayyed [21] |                                                                |                                                      |                                                                              |                                                             |                                                                                             |                                                                          |                                                       |                                                |                                      |                                                             |
| Tong [22]   |                                                                |                                                      |                                                                              |                                                             |                                                                                             |                                                                          |                                                       |                                                |                                      |                                                             |

|                |  |  |  |  |  |  |  |  |  |  |
|----------------|--|--|--|--|--|--|--|--|--|--|
| Wang [23]      |  |  |  |  |  |  |  |  |  |  |
| Wang [24]      |  |  |  |  |  |  |  |  |  |  |
| Wang [25]      |  |  |  |  |  |  |  |  |  |  |
| Yakovets [26]  |  |  |  |  |  |  |  |  |  |  |
| Yamayoshi [27] |  |  |  |  |  |  |  |  |  |  |
| Yang [28]      |  |  |  |  |  |  |  |  |  |  |
| Zhang [29]     |  |  |  |  |  |  |  |  |  |  |

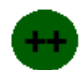

indicates low,

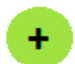

indicates probably low,

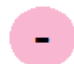

indicates probably high,

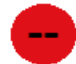

indicates high risk of bias

**Table S2.** Main data from the included studies.

|            | <b>Study group</b>                                               | <b>Control group</b>                                                                                             | <b>EVs Purification</b> | <b>EVs Characterization</b>                                                 | <b>EVs Localization/ Labeling and Tracking</b> | <b>EVs Target</b>                                          |
|------------|------------------------------------------------------------------|------------------------------------------------------------------------------------------------------------------|-------------------------|-----------------------------------------------------------------------------|------------------------------------------------|------------------------------------------------------------|
| Cohen [12] | A431 tumor-bearing mice injected with GNP-loaded EVs             | A431 tumor-bearing mice injected with free GNPs - not encapsulated within EVs                                    | UCG                     | SEM, NTA, WB for CD63                                                       | GNPs, IHC for CD63, CT, light microscopy       | HNSCC in mice model                                        |
| Cui [13]   | HSC-3DR TSCC line                                                | HSC NTECs                                                                                                        | UCG                     | TEM, NTA, WB for positive (CD9 and CD63), and negative (GM130) markers      | PKH67, fluorescence assays                     | HSC-3DR cells TSCC in mice model, genes: TUBB3 and PPP2R1B |
| Deng [14]  | miR-34a-EVs                                                      |                                                                                                                  | UCG                     | TEM, NTA, WB for positive (CD9 and TSG101), and negative (calnexin) markers | PKH67, Cy3                                     | OSCC (HN6 cells), SATB2                                    |
| Kase [15]  | siLCP1-loaded EBI3 EVs                                           | siControl-loaded EBI3 EVs                                                                                        | UCG                     | TEM, NTA, WB for positive markers (CD9, CD63, and CD81)                     | GFP, fluorescence assays, LSM, IVIS imaging    | OSCC in mice model                                         |
| Li [17]    | miR-138 $\gamma\delta$ Tcell-EVs applied to mice model and CAL27 | both: liposome – transfected miR-138 and scramble-cargo $\gamma\delta$ Tcell-EVs applied to mice model and CAL27 | UCG                     | SEM, FCM, WB for positive (CD63) and negative (calnexin) markers            | PKH26, fluorescence assays                     | OSCC                                                       |
| Li [16]    | SCC cell lines exposed to M-EVs/CA-miR-144/451a                  | SCC cell lines exposed to free miR-144/451a                                                                      | UCG                     | TEM, WB for positive markers (CD63, CD81, TSG101)                           | transwell assay                                | OSCC, MIF and CAB39 genes                                  |
| Liu [18]   | the SHED-EVs treated HUVEC and mice group                        | no treated HUVEC and mice group                                                                                  | EVs purification kit    | TEM, NTA, FCM, WB for positive markers (CD63, TSG101)                       | PHK67, fluorescence assays                     | OSCC in mice model                                         |
| Liu [19]   | the combination: MSCT-EV /G-SNS032                               | the single group: G-SNS032, MSCT-EV                                                                              | UCG                     | TEM, WB for positive markers (CD9, CD63, and CD81)                          |                                                |                                                            |
| Qiu [20]   | SCC25 cell line and OSCC model injected with MSC-EVs             | SCC25 cell line and OSCC model injected with MSCT-EVs/CTX                                                        | UCG                     | TEM, WB for positive markers (CD9, CD63)                                    | DiR                                            | SCC25 cell line, OSCC                                      |

|                |                                                                               |                                                                      |     |                                                                                                                     |                                  |                                  |
|----------------|-------------------------------------------------------------------------------|----------------------------------------------------------------------|-----|---------------------------------------------------------------------------------------------------------------------|----------------------------------|----------------------------------|
| Sayyed [21]    | ex vivo and in vivo OSCC tumor injected with EV loaded with miR-155 inhibitor | ex vivo and in vivo OSCC tumors injected with EVs loaded with NC     | UCG | SEM, NTA, WB for positive markers (CD9)                                                                             | GNPs, PHK67, fluorescence assays | OSCC, FOXO3a                     |
| Tong [22]      | HPV+ HNSCC cell                                                               | HPV- HNSCC cell                                                      | UCG | TEM, NTA, WB for positive (CD9, CD63, and TSG101) and negative (calnexin) markers                                   | PHK67, fluorescence assays       | PPAR $\delta$ gen in macrophages |
| Wang [23]      | EV/TRPP2 siRNA complex                                                        | siRNA only                                                           | UCG | TEM, WB for positive markers (CD9, CD63, and CD81)                                                                  | PKH26, fluorescence assays       | FaDu cells                       |
| Wang [24]      | NPC model treated with iRGD-EVs-antagomiRs compared with EVs-antagomiRs       | NPC model treated with iRGD-EVs antagomiR-BART10-5p or antagomiR-18a | UCG | DLS, TEM, LSM, WB for positive markers (CD9, CD63, and CD81)                                                        | DiD, DiI, fluorescence assays    | Spry3 gen in NPC                 |
| Wang [25]      | EBV positive and negative NPC model injected with $\gamma\delta$ -T-EVs       | EBV positive and negative NPC model injected PBS (control)           | UCG | TEM, FCM, WB for positive markers (CD9, CD63, and CD81)                                                             | DiR, CFSE, fluorescence assays   | NPC                              |
| Yakovets [26]  | mTHPC - EVs in PSCC 3D model                                                  | Foslip® and mTHPC-DCL in PSCC 3D model                               | UCG | TEM, WB for positive markers (CD9 and CD63)                                                                         | PKH67, fluorescence assays       | PSCC                             |
| Yamayoshi [27] | ExomiR-Trackers against miR-21                                                | Ctrl ExomiR-Trackers (without miR-21)                                | UCG | LSM, WB for positive markers (CD9, CD63 CD81, TSG101)                                                               | Alexa647, TAMRA                  | miR-21                           |
| Yang [28]      | the BMEVs+5-FU group                                                          | the 5-FU group                                                       | UCG | WB, TEM, NTA for BMEVs positive markers: HSP70; S-adenosyl-homocysteinase; glyceraldehyde 3 phosphate dehydrogenase | DiL                              | OSCC                             |
| Zhang [29]     | groups treated with:<br>- EV@Dox-EPT1<br>- free EVs<br>- free Dox             | controls treated with PBS                                            | UCG | DLS, TEM, WB for positive markers (CD9, CD63, TSG101)                                                               | Dox, DiL                         | OSCC                             |

A431 – the A431 human epidermal carcinoma cell line, BMEVs – bitter melon-derived EVs, CFSE – carboxyfluorescein succinimidyl ester, DiD – 1,10 -dioctadecyl-3,3,30,30 -tetramethylindodicarbocyanine perchlorate, DiL – 1,1'-dioctadecyl-3,3,3',3'-tetramethylindodicarbocyanine perchlorate, DiR – 1,1'-dioctadecyl-3,3,3',3'-tetramethylindodicarbocyanine iodide, DLS – dynamic light scattering, Dox – doxorubicin, Exo@Dox-EPT1 – exosome-doxorubicin-anthracycline endoperoxide derivative NPs, FaDu cells – a cell line originating from human PSCC, FCM – flow cytometry, Foslip® – mTHPC in conventional liposomes, GFP – the green fluorescent protein, GNPs – gold nanoparticles, HEK293T cells – human embryonic kidney cells, HNSCC – head and neck SCC, HSC – hematopoietic stem cell, HSC-3DR – docetaxel-resistant HSC-3 line, HSP70 – heat shock protein 70, HUVEC – human umbilical vein endothelial cell, IHC – immunohistochemical staining, LSM – a confocal laser scanning microscope, mTHPC – temoporfin meta-tetra (hydroxyphenyl) chlorin, mTHPC-DCL – mTHPC drug-in-cyclodextrin-in-liposomes, M-EVs – macrophage-derived exosomes, MSC – mesenchymal stem cells, MSCT-EVs – transfected MSC-EVs, NC – normal control, NLRP3 – NOD-like receptor family pyrin domain containing 3, NPC – nasopharyngeal carcinoma, NTA –

nanoparticle tracking analysis, octEVs – engineered OSCC-targeted EVs that express a transmembrane EBV protein (Induced-3 [EBI3]), OSCC – oral SCC, PBS – phosphate-buffered saline, PKH 26/67 – red fluorescence linker, PSCC – pharyngeal SCC, ROS – reactive oxygen species, SATB2 – the special AT-rich sequence-binding protein 2, SCC – squamous cell carcinoma, SEM – scanning electron microscope, SHED – stem cells of human deciduous exfoliated teeth, TAMRA – Carboxytetramethylrhodamine, TECs – normal tongue epithelial cells, TSCC – tongue SCC, UCG – ultracentrifugation, UPCI-SCC-131 – human OSCC cell lines, WB – Western blot
